# Supplementary material for: Biphenyl-containing amido Schiff base derivative as a turn-on fluorescent chemosensor for Al3+ and Zn2+ ions
Source: Royal Society of Chemistry journal article supplement (doi:10.1039/d2nj03144b), 2022-01-01
Supplement: d2nj03144b1.pdf [file d2nj03144b1.pdf]

**Biphenyl Containing Amido Schiff base Derivative as a Turn-on Fluorescent Chemosensor for Al<sup>3+</sup> and Zn<sup>2+</sup> ions**

Anamika Hoque,<sup>a</sup> Md. Sanaul Islam,<sup>a</sup> Meheebub Ali Khan,<sup>a</sup> Soumen Ghosh<sup>a\*</sup>, Md. Asraful Sekh<sup>b\*</sup>, Sahid Hussain<sup>c\*</sup> and Md. Akhtarul Alam<sup>a\*</sup>

<sup>a</sup>Department of Chemistry, Aliah University, Action Area IIA/27, New Town, Kolkata-700160, India

<sup>b</sup>Department of Electronics and Communication Engineering, Aliah University, Action Area IIA/27, New Town, Kolkata-700160, India

<sup>c</sup>Department of Chemistry, Indian Institute of Technology, Patna 801106, India

\*Corresponding author, E-mail: soumen0003@gmail.com (S.G), asekh@yahoo.com (M.A.S.), sahid@iitp.ac.in (S.H) and alam\_iitg@yahoo.com (M.A.A.)

## Table of Contents

|                                               |     |
|-----------------------------------------------|-----|
| 1. General, Materials and Methods .....       | S3  |
| 2. Benesi-Hildebrand Plot .....               | S4  |
| 3. UV-vis titration.....                      | S6  |
| 4. Job's plot .....                           | S7  |
| 5. Fluorescence titration.....                | S9  |
| 6. Detection limit .....                      | S10 |
| 7. <sup>1</sup> H NMR titration spectra ..... | S12 |
| 8. Mass spectra.....                          | S13 |
| 9. Probable structure.....                    | S14 |
| 10. Effect of pH .....                        | S16 |
| 11. Competition experiment.....               | S17 |
| 12. UV-vis spectra with EDTA.....             | S19 |
| 13. Emission spectra with EDTA.....           | S21 |
| 14. Comparative table.....                    | S24 |
| 15. Application study table.....              | S25 |
| 16. References.....                           | S26 |

## **1. General**

### **1.1. Materials**

All reagents and spectroscopic grade solvents were used as received from commercial sources without further purification. All cations in the form of perchlorate / nitrate salts were purchased from Sigma-Aldrich Chemical Company. Solvents used for spectroscopic studies were of spectroscopic grade. Aqueous medium experiments have been done in deionized water.

### **1.2. Methods**

Hitachi UV–vis (Model U-3501) spectrophotometer and Perkin Elmer LS-55 spectrofluorometer, were used to record the absorption spectra and emission spectra respectively. IR spectra (KBr pellet, 4000–400  $\text{cm}^{-1}$ ) were recorded on a Parkin Elmer model 883 infrared spectrophotometer. Shimadzu LCMS-2020 was used for recording mass spectrum.  $^1\text{H}$  NMR and  $^{13}\text{C}$  NMR spectra were recorded on a Bruker, Avance 500 spectrometer, where chemical shifts ( $\delta$  in ppm) were determined with respect to tetramethylsilane (TMS) as internal standards.

## 2. Benesi-Hildebrand Plot:

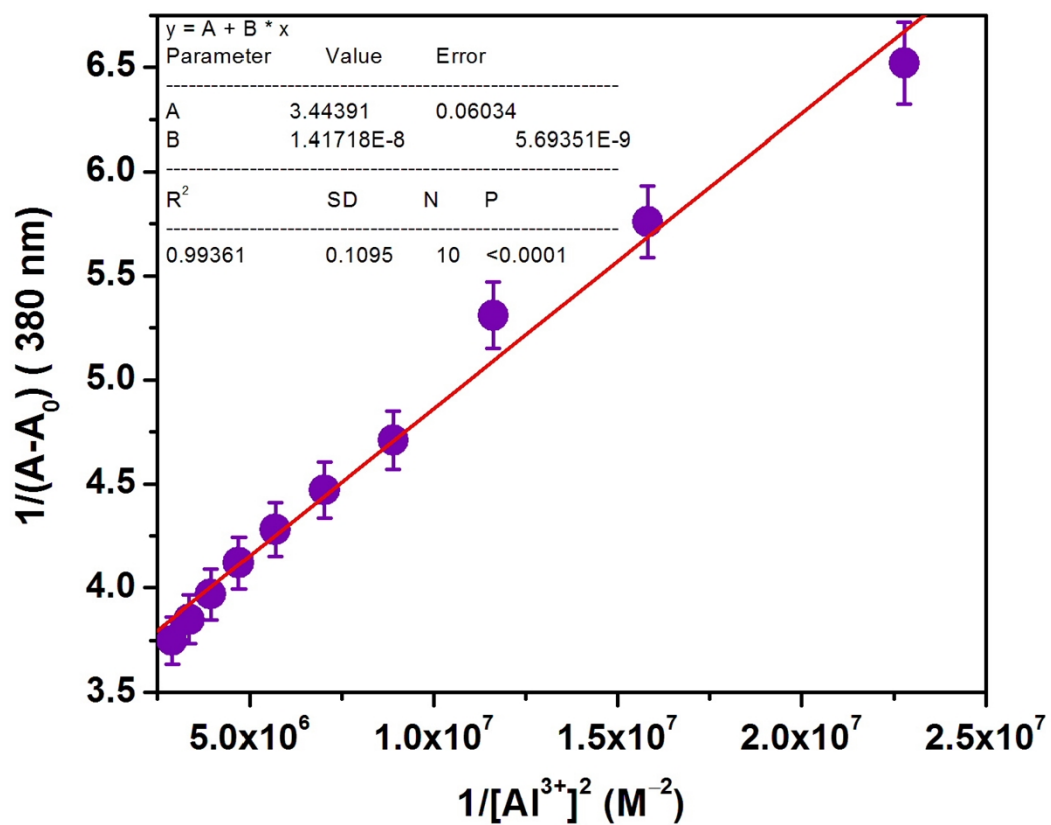

Figure S1. B-H plot for UV-vis titration of **1** with  $Al^{3+}$

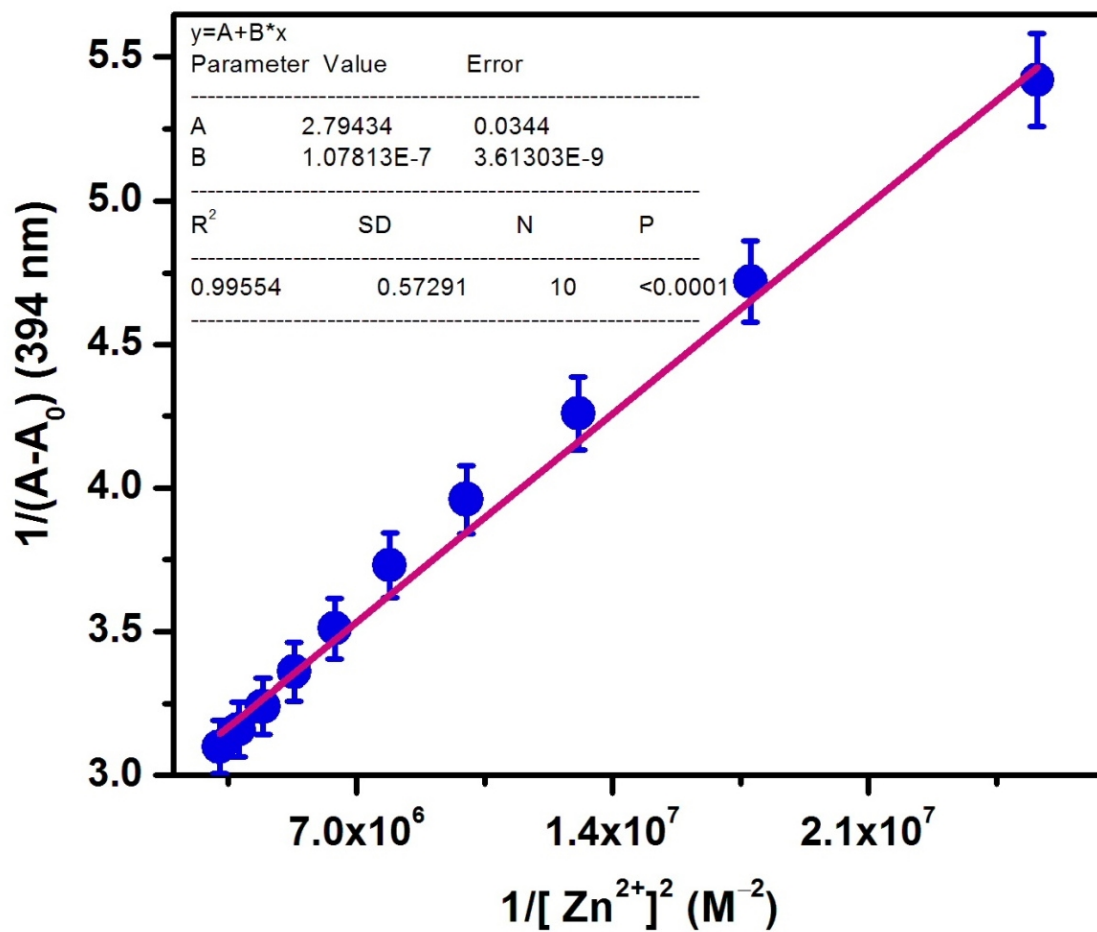

Figure S2. B–H plot for UV-vis titration of **1** with  $Zn^{2+}$ .

### 3. UV-vis titration:

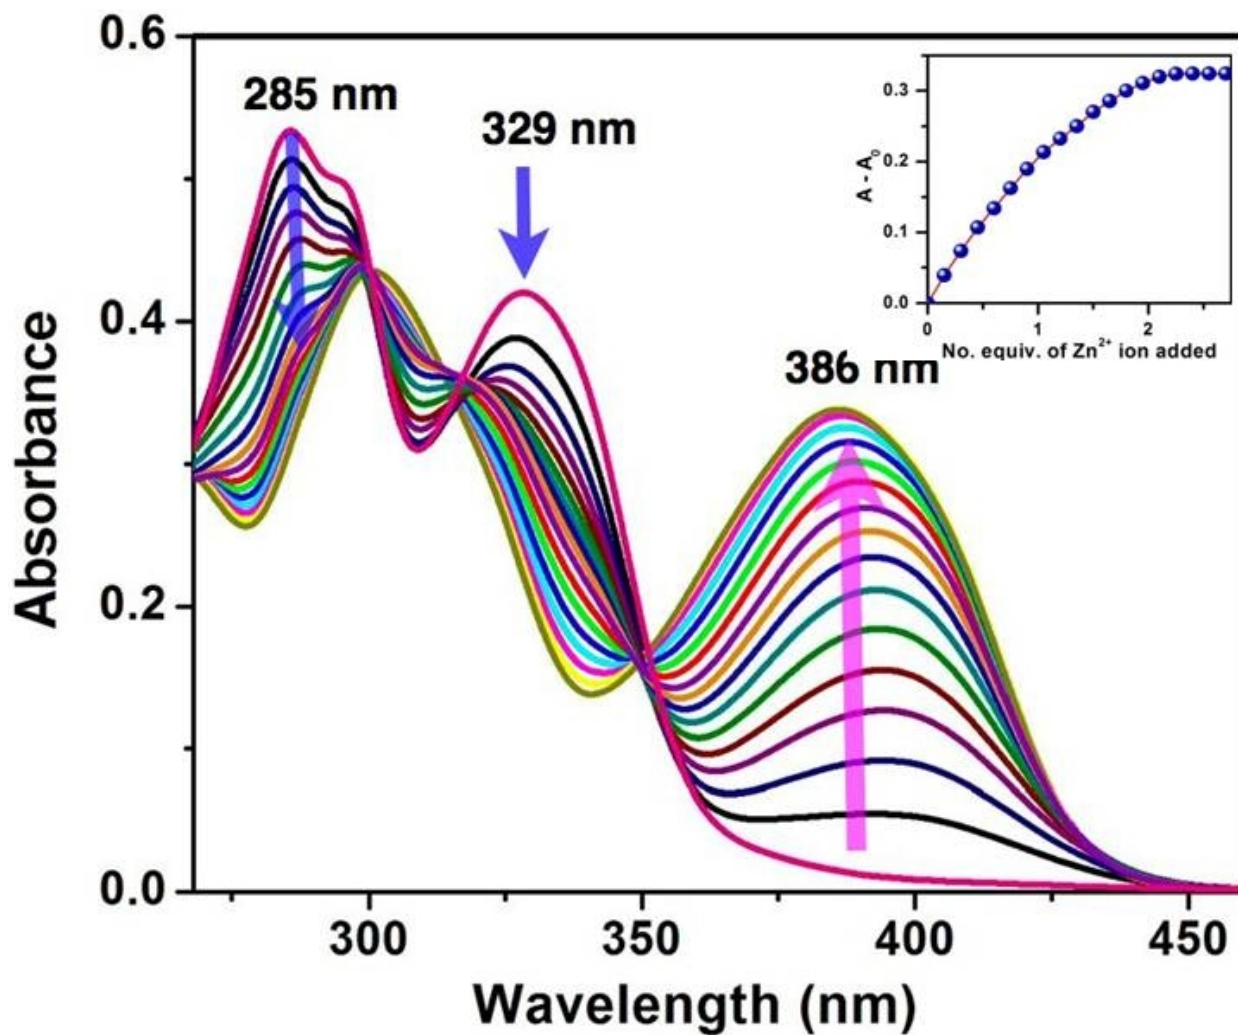

**Figure S3.** UV-vis titration of **1** ( $1 \times 10^{-5}$  M) in DMF- H<sub>2</sub>O solvent (v/v, 7:3) upon addition of (0-3 equivalents) of Zn<sup>2+</sup> ion ( inset: absorbance at 386 nm as a function of the equivalence of Zn<sup>2+</sup> ion).

#### 4. Job's plot:

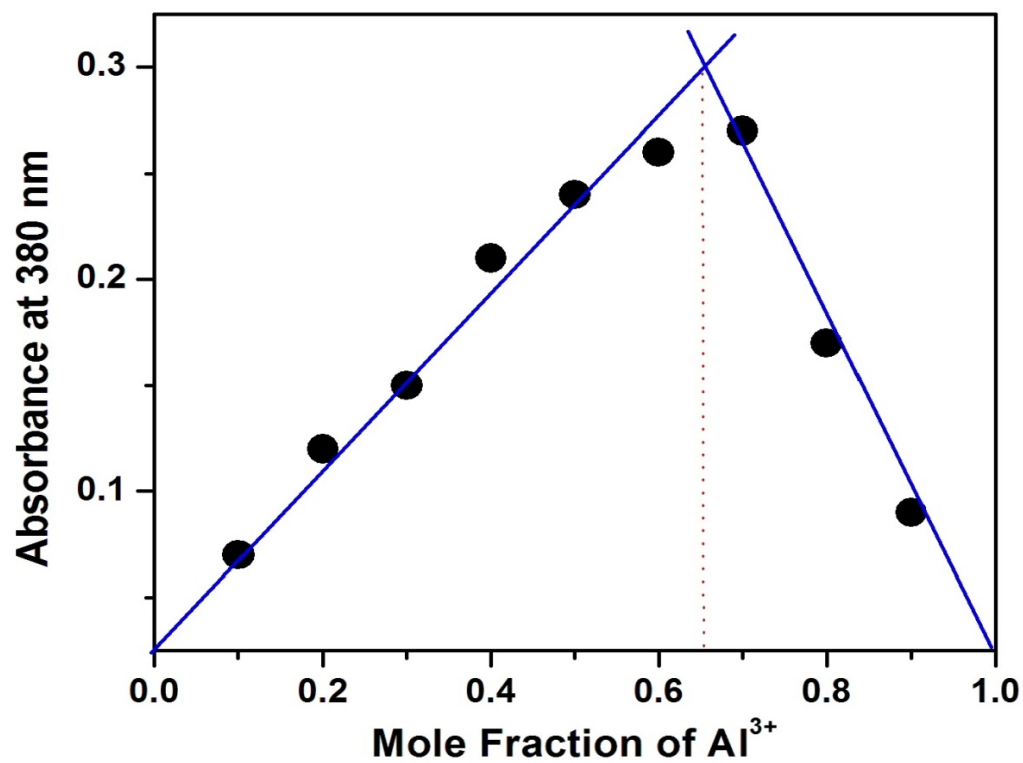

Figure S4. Job's plot for determining the stoichiometry of sensor **1** and  $\text{Al}^{3+}$  in the complex.

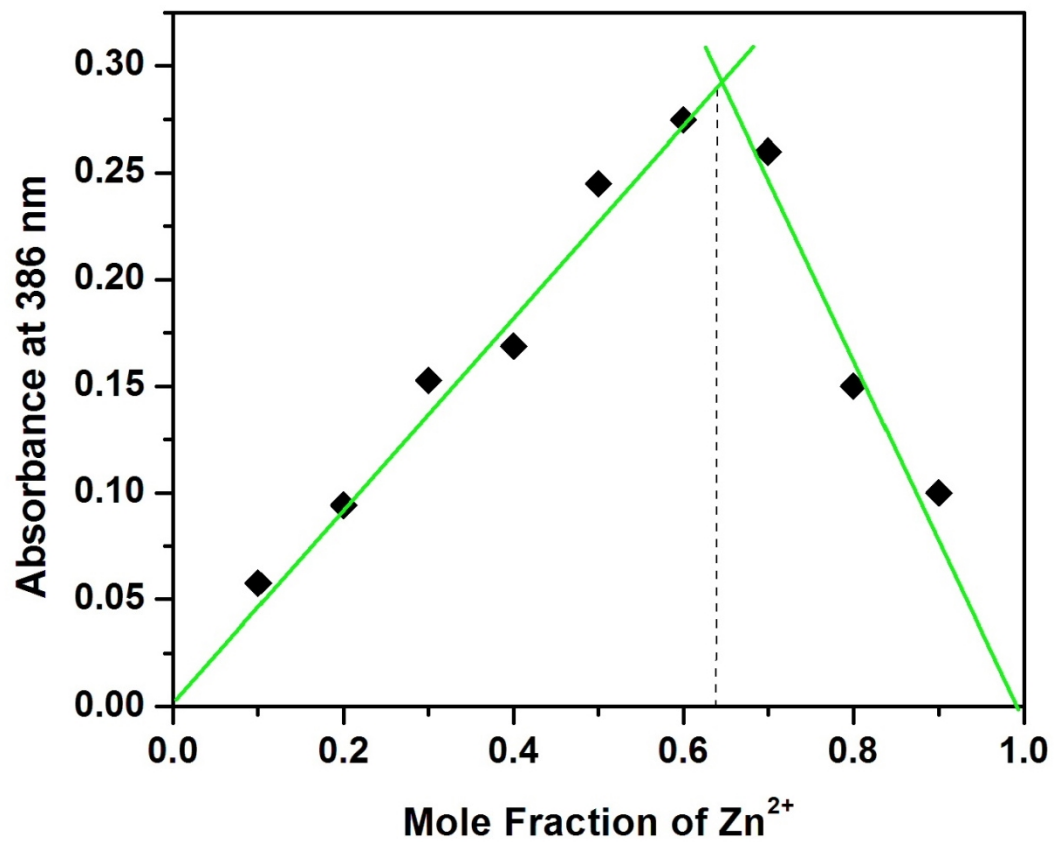

**Figure S5.** Job's plot for determining the stoichiometry of molecule **1** and Zn<sup>2+</sup> in the complex.



## 5. Fluorescence spectra

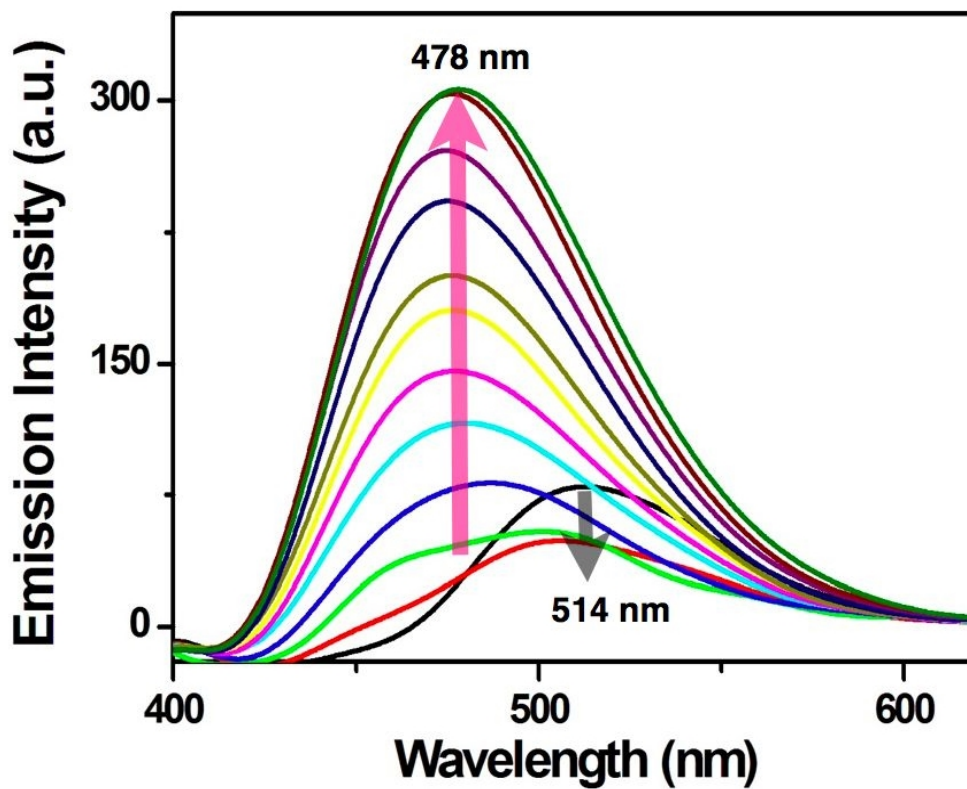

**Figure S6.** Changes in fluorescence spectra of sensor **1** ( $1 \times 10^{-6}$  M) in the DMF- $\text{H}_2\text{O}$  solution (v/v, 7:3) induced by  $\text{Zn}^{2+}$  ion.

## 6. Detection limit:

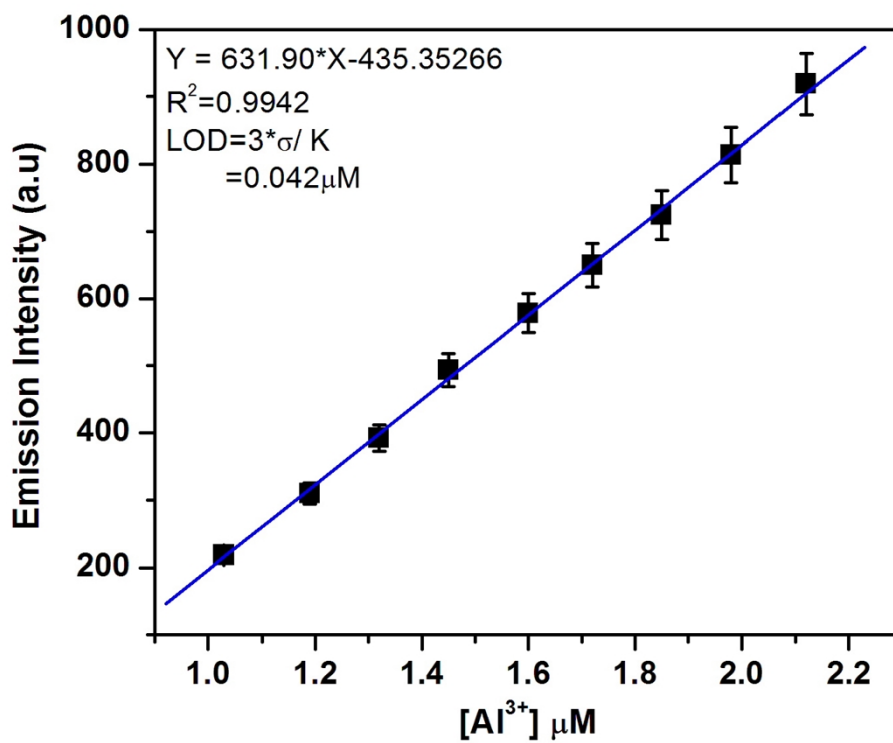

Figure S7. Detection limit of molecule **1** to Al<sup>3+</sup> based on 3σ/slope

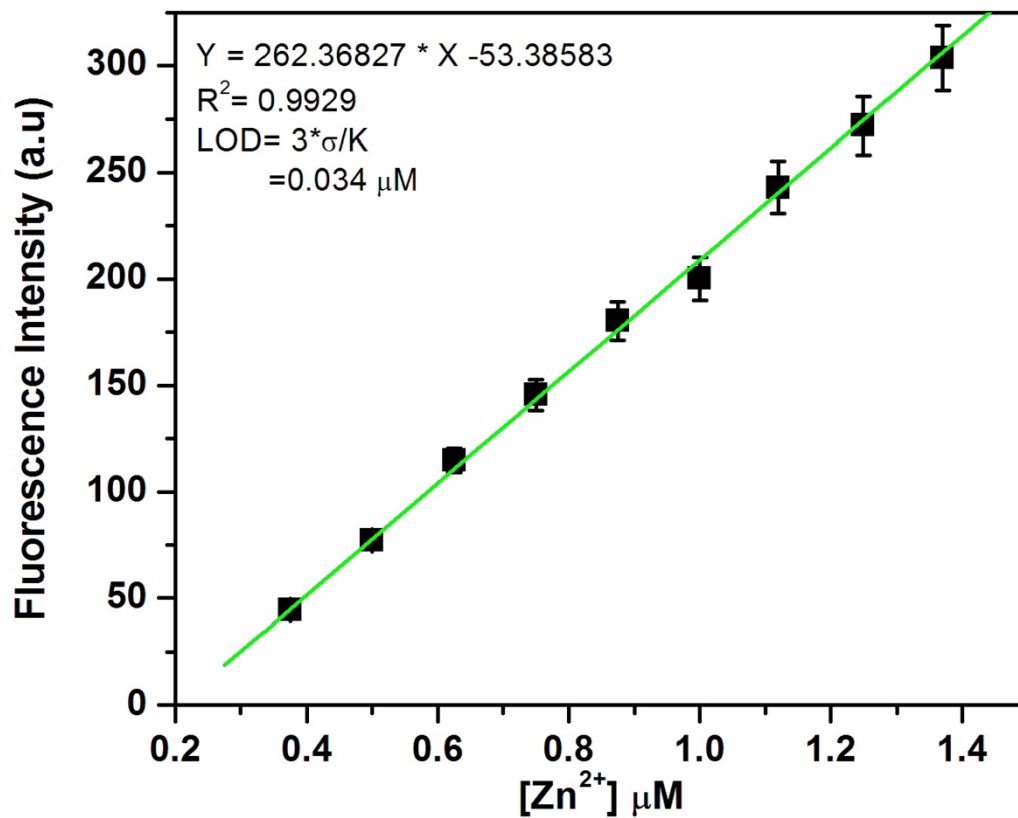

Figure S8. Detection limit of molecule **1** to Zn<sup>2+</sup> based on 3σ/slope.

### 7. $^1\text{H}$ NMR titration spectra:

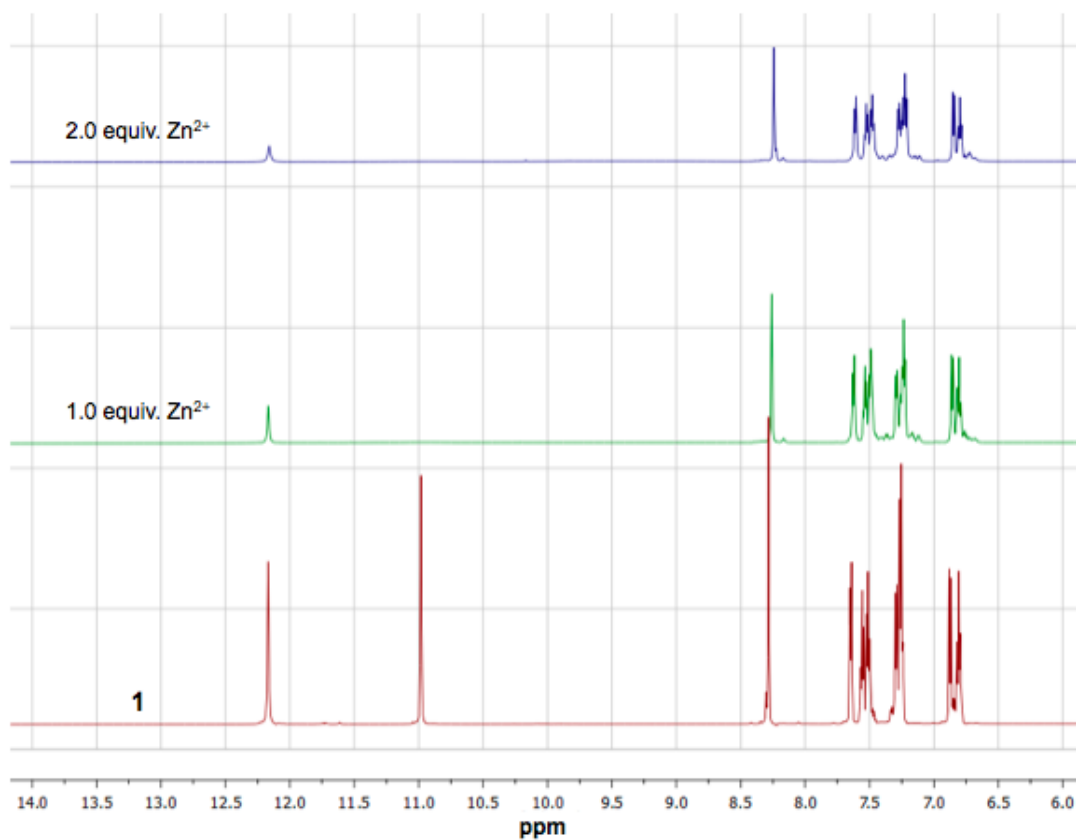

**Figure S9.** Partial  $^1\text{H}$  NMR titration spectra of sensor **1** in  $d_6$ -DMSO upon addition of different amount of  $\text{Zn}^{2+}$  ion

## 8. Mass spectra:

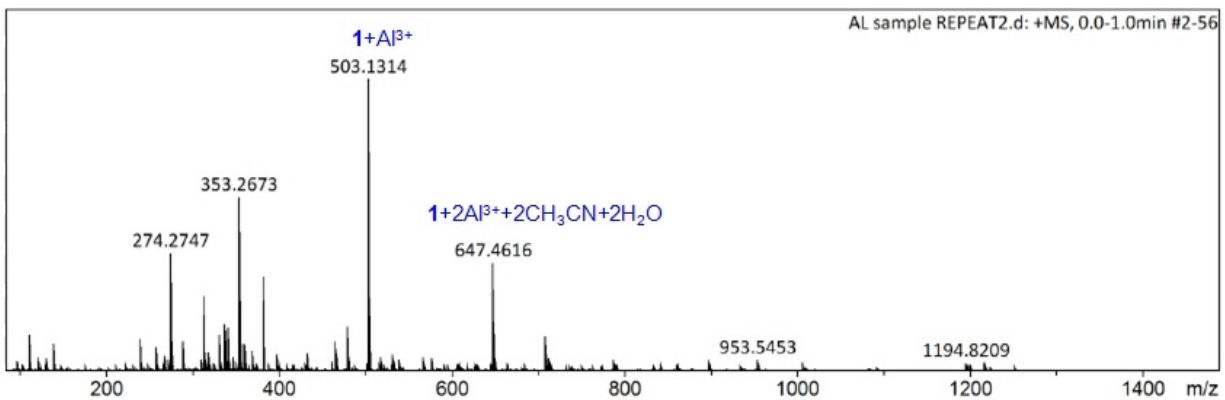

**Figure S10.** Mass spectrum of 1-Al<sup>3+</sup> complex.

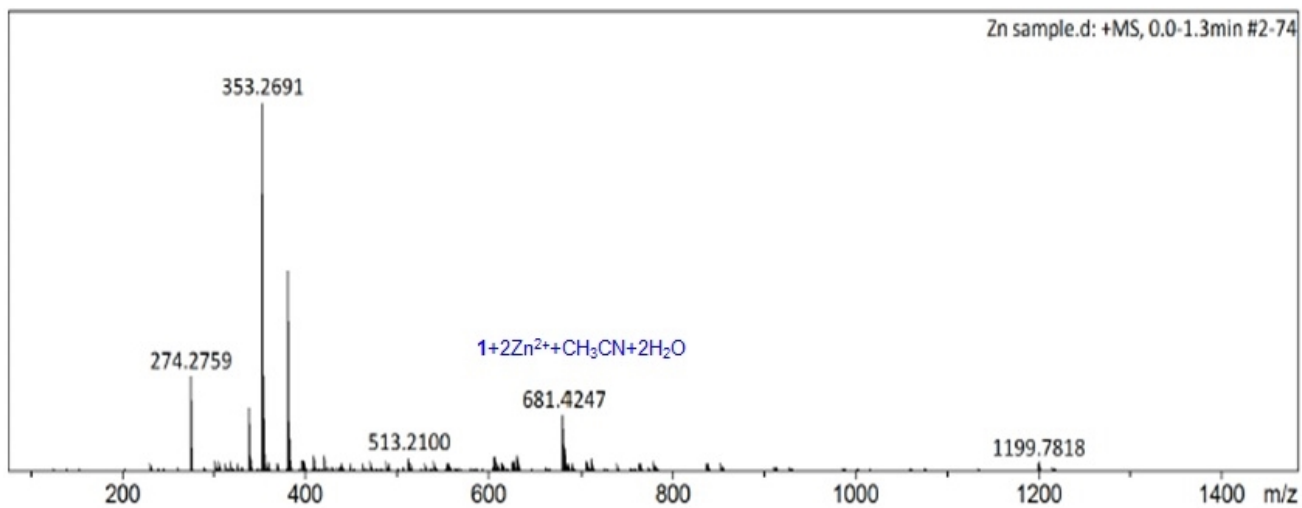

**Figure S11.** Mass spectrum of 1-Zn<sup>2+</sup> complex.

9. Probable structure:

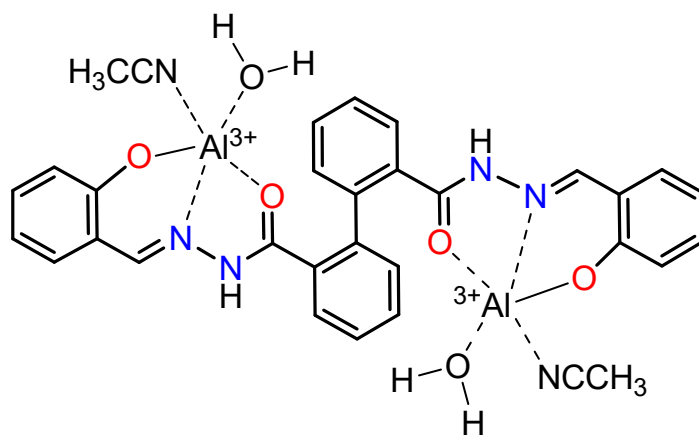

Figure S12. Probable structure of 1- Al<sup>3+</sup> complex

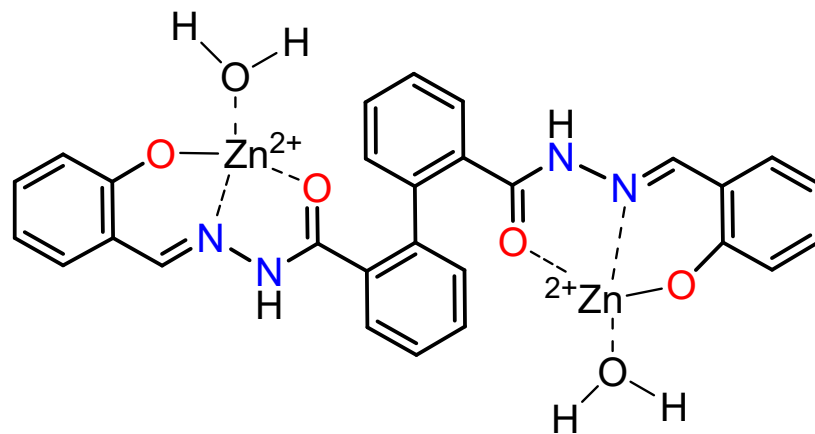

**Figure S13.** Probable structure of **1**- Zn<sup>2+</sup> complex

## 10. Effect of pH

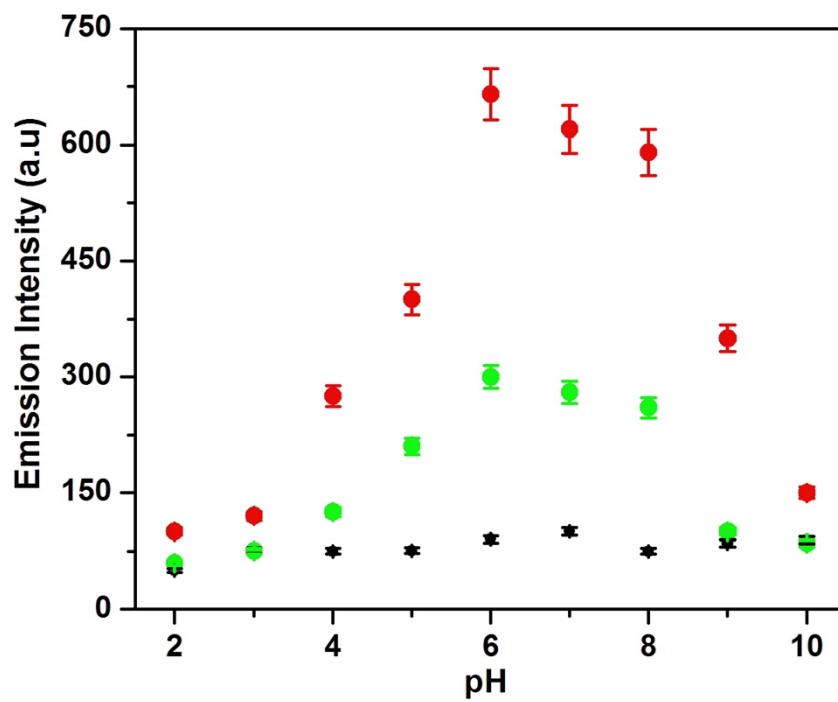

**Figure S14.** Change in fluorescence intensity sensor 1 ( $1 \times 10^{-6}$  M) (●), its Al<sup>3+</sup> (●) and Zn<sup>2+</sup> (●) complexes in different pH values.



## 11. Competition experiment:

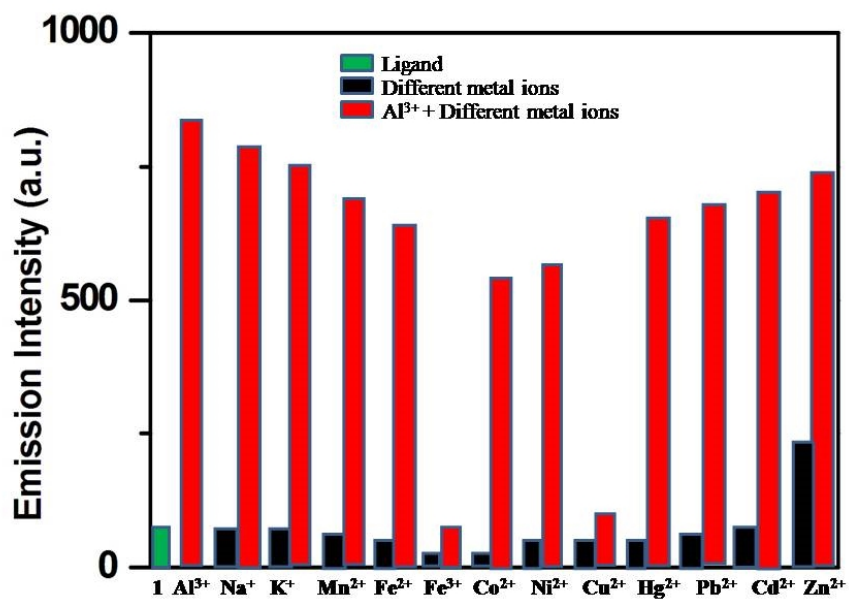

**Figure S15** Competition experiments of **1**, a plot of fluorescence intensity at 458 nm of **1** with addition of 3.0 equiv. of  $\text{Al}^{3+}$ , and then 10.0 equiv. of various metal ions, ( $\lambda_{\text{ex}}$ : 350 nm).

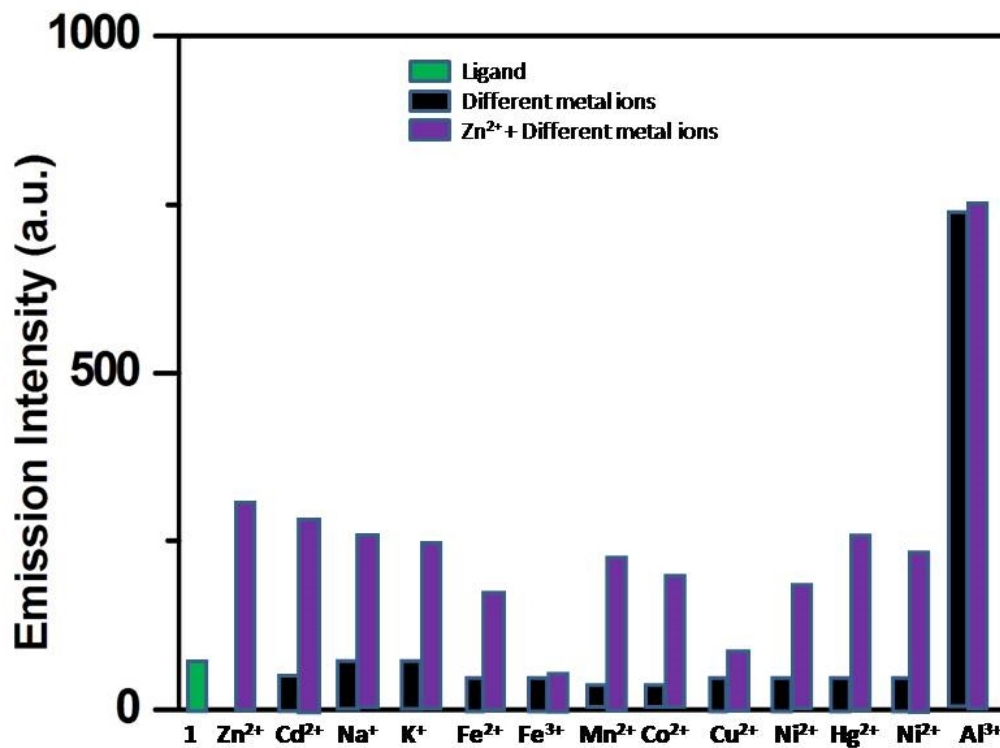

**Figure S16.** Competition experiments of **1**, a plot of fluorescence intensity at 478 nm of **1** with addition of 3.0 equiv. of Zn<sup>2+</sup>, and then 10.0 equiv. of various metal ions, ( $\lambda_{\text{ex}}$ : 350 nm).

## 12. UV-Vis spectra with EDTA:

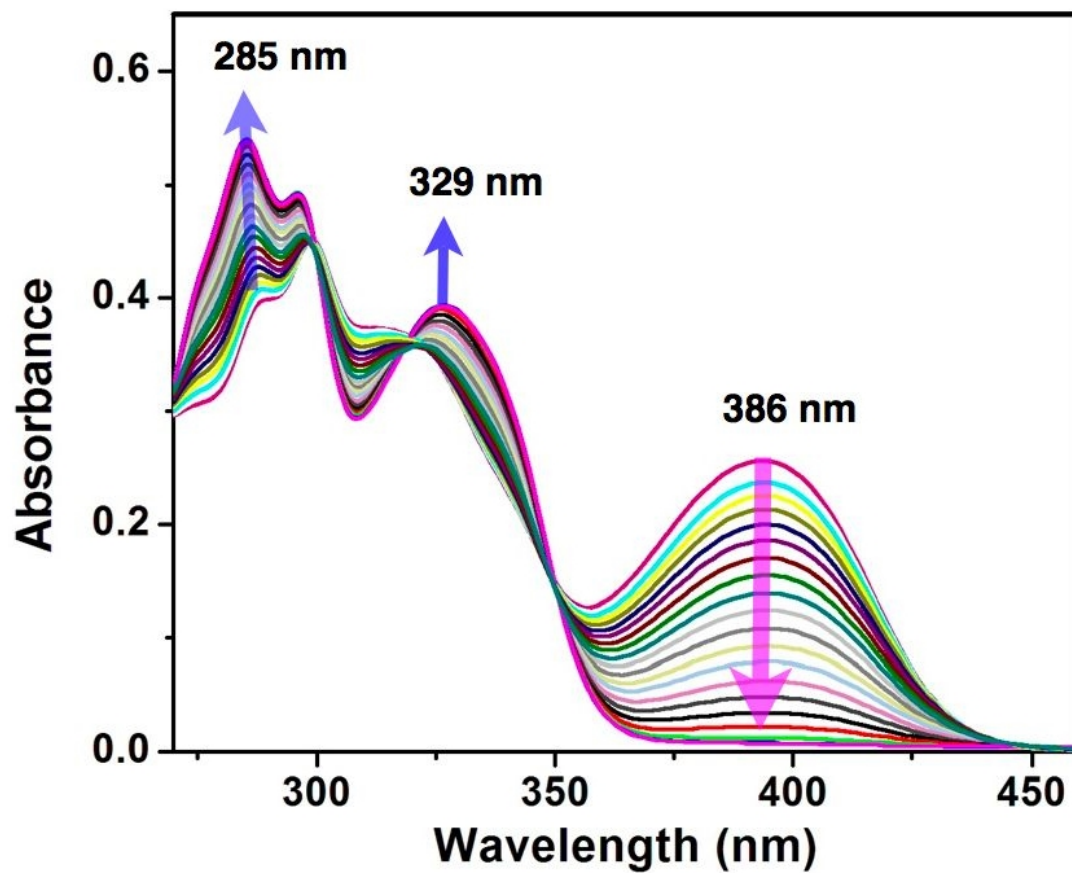

Figure S17. UV-Vis titration of 1- Zn<sup>2+</sup> complex with EDTA in DMF- H<sub>2</sub>O solvent (v/v, 7:3).

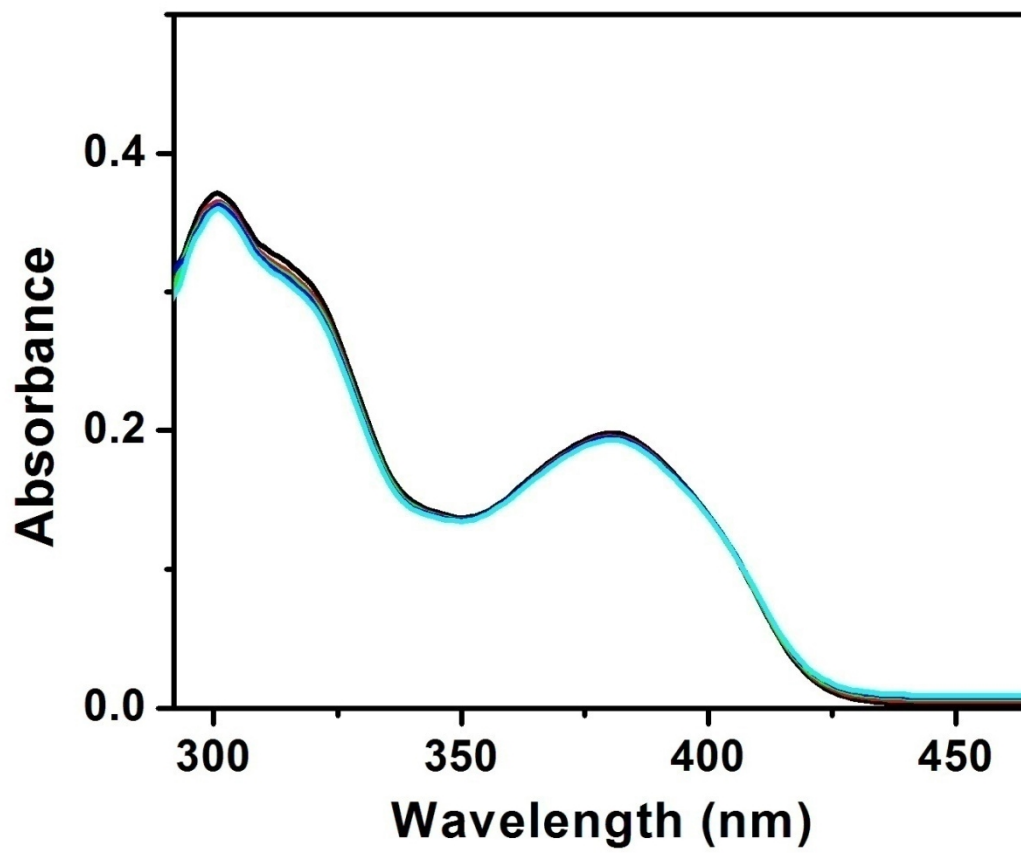

**Figure S18.** UV-Vis titration of Al<sup>3+</sup>-1 complex with EDTA in DMF- H<sub>2</sub>O solvent (v/v, 7:3).

### 13. Emission spectra with EDTA:

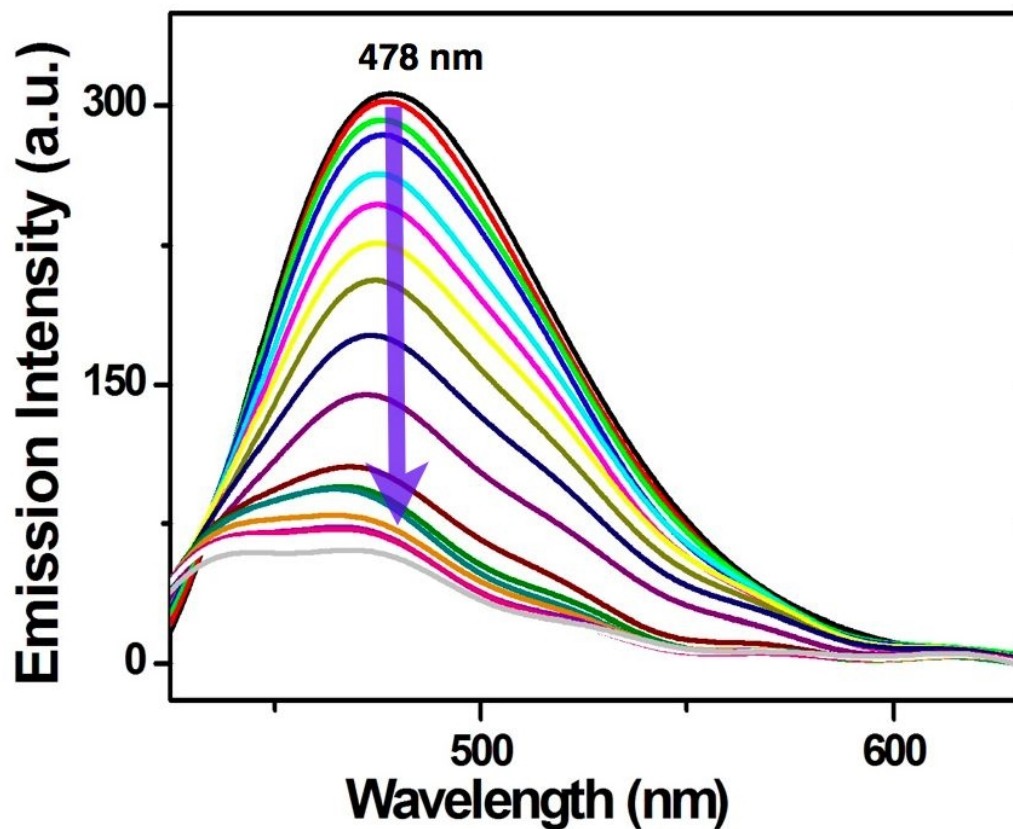

Figure S19. Fluorescence titration of 1-Zn<sup>2+</sup> complex in DMF-H<sub>2</sub>O solvent (v/v, 7:3) upon addition of (0-5 equivalents) of EDTA.

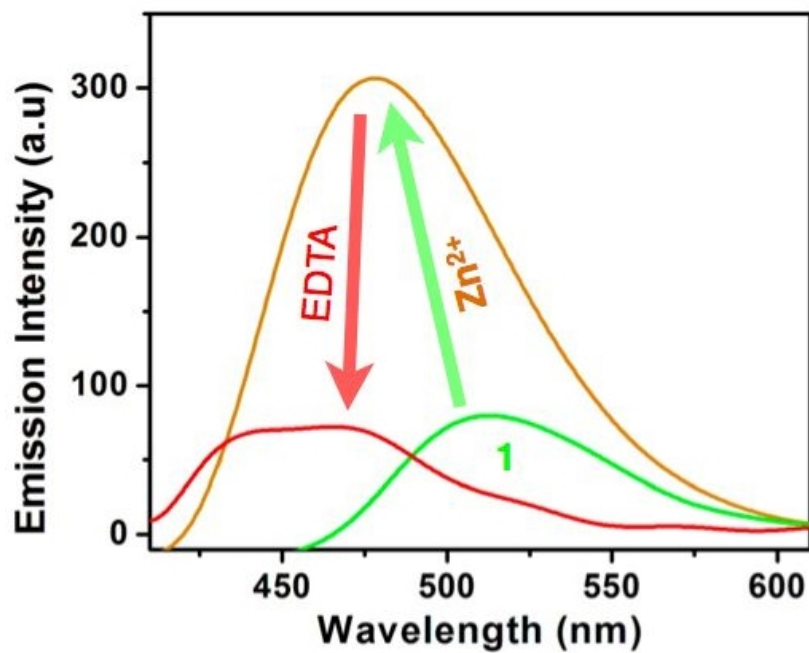

**Figure S20.** Fluorescence intensity change of **1** and **1-Zn<sup>2+</sup>** complex upon addition of **Zn<sup>2+</sup>** and EDTA sequentially in DMF-H<sub>2</sub>O solvent (v/v, 7:3)

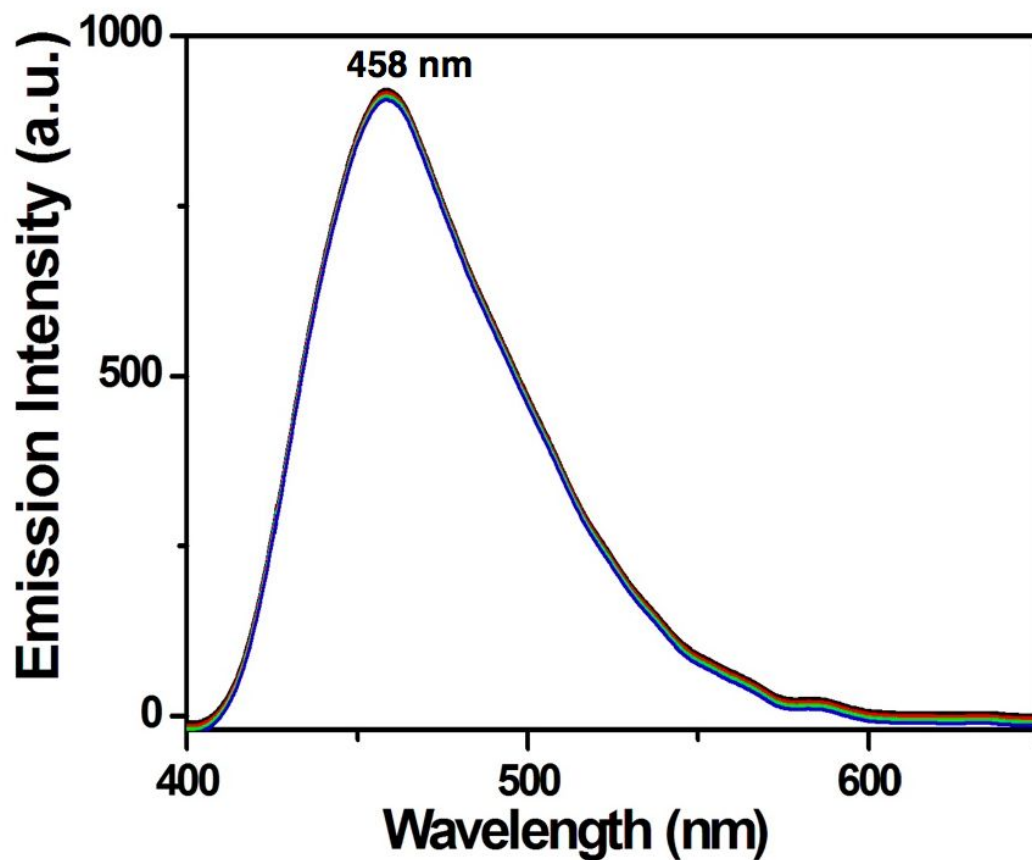

**Figure S21.** Fluorescence titration of 1-Al<sup>3+</sup> complex in DMF- H<sub>2</sub>O solvent (v/v, 7:3) upon addition of (0-5 equivalents) of EDTA.

## 14. Comparative table:

**Table S1:** Comparative table of past reported probes on the basis of their medium, binding constant, limit of detection and application.

| Sl.No. | Analyte                                                         | Medium                                                                                     | Method                       | Binding Constant( $K_b$ )                                                                                                      | Detection limit (M)                                                                                                             | Applications                                   | Ref.      |
|--------|-----------------------------------------------------------------|--------------------------------------------------------------------------------------------|------------------------------|--------------------------------------------------------------------------------------------------------------------------------|---------------------------------------------------------------------------------------------------------------------------------|------------------------------------------------|-----------|
| 1      | Al <sup>3+</sup><br>Cu <sup>2+</sup>                            | EtOH/Water                                                                                 | Fluorometric<br>Colorimetric | Al <sup>3+</sup> : $2.83 \times 10^{10}$<br>Cu <sup>2+</sup> : $5.69 \times 10^9$                                              | Al <sup>3+</sup> : $9.10 \times 10^{-8}$<br>Cu <sup>2+</sup> : $3.54 \times 10^{-7}$                                            | Logic gate, Live cell imaging and paper strips | 1         |
| 2      | Al <sup>3+</sup> , F <sup>-</sup>                               | DMSO/ H <sub>2</sub> O                                                                     | Fluorometric                 | Al <sup>3+</sup> : $8.50 \times 10^5$                                                                                          | Al <sup>3+</sup> : $1.05 \times 10^{-8}$                                                                                        | Logic gate, Live cell imaging                  | 2         |
| 3      | Al <sup>3+</sup><br>H <sub>3</sub> PO <sub>4</sub> <sup>-</sup> | CH <sub>3</sub> OH                                                                         | Fluorometric                 | Al <sup>3+</sup> : $3.6 \times 10^4$                                                                                           | Al <sup>3+</sup> : $8.30 \times 10^{-7}$<br>H <sub>3</sub> PO <sub>4</sub> <sup>-</sup> : $1.7 \times 10^{-6}$                  | Paper strips                                   | 3         |
| 4      | Al <sup>3+</sup><br>Zn <sup>2+</sup>                            | CH <sub>3</sub> OH/HEPES Buffer                                                            | Fluorometric                 | Al <sup>3+</sup> : $1.3 \times 10^6$<br>Zn <sup>2+</sup> : $7.9 \times 10^4$                                                   | Al <sup>3+</sup> : $8.30 \times 10^{-8}$<br>Zn <sup>2+</sup> : $1.24 \times 10^{-7}$                                            | Logic gate<br>Live cell imaging                | 4         |
| 5      | Al <sup>3+</sup>                                                | CH <sub>3</sub> OH / H <sub>2</sub> O                                                      | Fluorometric                 | Al <sup>3+</sup> : $5.42 \times 10^5$                                                                                          | Al <sup>3+</sup> : $3.55 \times 10^{-7}$                                                                                        | Paper strips<br>Logic gate                     | 5         |
| 6      | Al <sup>3+</sup><br>Cr <sup>3+</sup>                            | CH <sub>3</sub> CN                                                                         | Fluorometric                 | Al <sup>3+</sup> : $5.44 \times 10^4$<br>Cr <sup>3+</sup> : $8.33 \times 10^4$                                                 | Al <sup>3+</sup> : $3.1 \times 10^{-7}$<br>Cr <sup>3+</sup> : $2.5 \times 10^{-7}$                                              | -                                              | 6         |
| 7      | Al <sup>3+</sup>                                                | DMSO/ H <sub>2</sub> O                                                                     | Fluorometric                 | Al <sup>3+</sup> : $4.09 \times 10^4$                                                                                          | Al <sup>3+</sup> : $1.20 \times 10^{-7}$                                                                                        | Live cell imaging                              | 7         |
| 8      | Al <sup>3+</sup>                                                | DMSO/ H <sub>2</sub> O                                                                     | Fluorometric                 |                                                                                                                                | Al <sup>3+</sup> : $1.90 \times 10^{-6}$                                                                                        | -                                              | 8         |
| 9      | Al <sup>3+</sup>                                                | CH <sub>3</sub> OH /H <sub>2</sub> O                                                       | Fluorometric                 | $2.85 \times 10^5$                                                                                                             | Al <sup>3+</sup> : $1.1 \times 10^{-7}$                                                                                         | -                                              | 9         |
| 10     | Al <sup>3+</sup><br>Zn <sup>2+</sup><br>Cd <sup>2+</sup>        | CH <sub>3</sub> OH /HEPES Buffer                                                           | Fluorometric                 | Al <sup>3+</sup> :<br>$1.5 \times 10^3 M^{-1/2}$<br>Zn <sup>2+</sup> : $5 \times 10^5$<br>Cd <sup>2+</sup> : $3.5 \times 10^5$ | Al <sup>3+</sup> : $5.7 \times 10^{-9}$<br>Zn <sup>2+</sup> : $1.09 \times 10^{-6}$<br>Cd <sup>2+</sup> : $1.64 \times 10^{-6}$ | -                                              | 10        |
| 11     | Al <sup>3+</sup><br>Cu <sup>2+</sup>                            | CH <sub>3</sub> CN                                                                         | Fluorometric<br>Colorimetric | Al <sup>3+</sup> : $1.80 \times 10^4$<br>Cu <sup>2+</sup> : $2.02 \times 10^4$                                                 | Al <sup>3+</sup> : $1.48 \times 10^{-6}$<br>Cu <sup>2+</sup> : $2.05 \times 10^{-6}$                                            | -                                              | 11        |
| 12     | Al <sup>3+</sup>                                                | DMF/H <sub>2</sub> O                                                                       | Fluorometric                 | Al <sup>3+</sup> : $2.75 \times 10^3$                                                                                          | Al <sup>3+</sup> : $4.9 \times 10^{-7}$                                                                                         | Paper strips                                   | 12        |
| 13     | Al <sup>3+</sup>                                                | CH <sub>3</sub> OH                                                                         | Fluorometric                 | Al <sup>3+</sup> : $1.6 \times 10^4$                                                                                           | Al <sup>3+</sup> : $2.7 \times 10^{-7}$                                                                                         | Paper strips                                   | 13        |
| 14     | Al <sup>3+</sup>                                                | DMSO                                                                                       | Fluorometric                 | Al <sup>3+</sup> : $1.4 \times 10^4$                                                                                           | Al <sup>3+</sup> : $2.0 \times 10^{-7}$                                                                                         | Paper strips                                   | 14        |
| 15     | Al <sup>3+</sup><br>Zn <sup>2+</sup>                            | CH <sub>3</sub> OH /H <sub>2</sub> O Buffer<br>CH <sub>3</sub> OH /H <sub>2</sub> O Buffer | Fluorometric                 | Al <sup>3+</sup> : $1.94 \times 10^4$<br><br>Zn <sup>2+</sup> : $1.19 \times 10^5$                                             | Al <sup>3+</sup> : $1.45 \times 10^{-7}$<br><br>Zn <sup>2+</sup> : $1.29 \times 10^{-8}$                                        | -                                              | 15        |
| 16     | Al <sup>3+</sup><br>Zn <sup>2+</sup>                            | Tris-HCl buffer<br>EtOH /H <sub>2</sub> O                                                  | Fluorometric                 | Al <sup>3+</sup> : $3.50 \times 10^9$<br>M <sup>-2</sup><br>Zn <sup>2+</sup> : $4.27 \times 10^4$<br>M <sup>-1</sup>           | Al <sup>3+</sup> : $1.27 \times 10^{-7}$<br>M<br>Zn <sup>2+</sup> : $5.5 \times 10^{-8}$<br>M                                   | Recovery in real samples                       | 16        |
| 17     | Al <sup>3+</sup><br>Zn <sup>2+</sup>                            | DMF/H <sub>2</sub> O                                                                       | Fluorometric                 | Al <sup>3+</sup> : $2.43 \times 10^8$<br>M <sup>-2</sup><br>Zn <sup>2+</sup> : $2.59 \times 10^7$<br>M <sup>-2</sup>           | Al <sup>3+</sup> : $4.2 \times 10^{-8}$<br>M<br>Zn <sup>2+</sup> : $3.4 \times 10^{-8}$<br>M                                    | Paper strips<br>Logic gate                     | This work |



**15. Application study table:**

Table S2: Determination of Al<sup>3+</sup> recovery sample.

| Sample         | Al <sup>3+</sup> added ( $\mu$ mol L <sup>-1</sup> ) | Al <sup>3+</sup> found ( $\mu$ mol L <sup>-1</sup> ) | Recovery (%) | R.S.D (n=3)(%) |
|----------------|------------------------------------------------------|------------------------------------------------------|--------------|----------------|
| Tap water      | 0.00                                                 | 0.00                                                 | -            | -              |
|                | 10.00                                                | 9.60                                                 | 96.0         | 1.52           |
| Drinking water | 0.00                                                 | 0.00                                                 | -            | -              |
|                | 10.00                                                | 9.80                                                 | 98.0         | 0.73           |

Table S3: Determination of Zn<sup>2+</sup> recovery sample.

| Sample         | Zn <sup>2+</sup> added ( $\mu$ mol L <sup>-1</sup> ) | Zn <sup>2+</sup> found ( $\mu$ mol L <sup>-1</sup> ) | Recovery (%) | R.S.D (n=3)(%) |
|----------------|------------------------------------------------------|------------------------------------------------------|--------------|----------------|
| Tap water      | 0.00                                                 | 0.00                                                 | -            | -              |
|                | 10.00                                                | 9.33                                                 | 93.3         | 2.46           |
| Drinking water | 0.00                                                 | 0.00                                                 | -            | -              |
|                | 10.00                                                | 9.50                                                 | 95.0         | 1.78           |

## 16. References:

1. P. Yadav, R. Kumar, S. Srikrishna, A. K. Pandey, L. H. Choudhury, C. Upadhyay, V. P. Singh, A reversible and efficient probe for dual mode recognition of  $\text{Al}^{3+}$  and  $\text{Cu}^{2+}$  with logic gate behaviour: Crystal structure, theoretical and in-vivo bio-imaging investigations, *Spectrochimica Acta Part A*, 267 (2022) 120552.
2. D. Sarkar, P. Ghosh, S. Gharami, T.K. Mondal, N. Murmu, A novel coumarin based molecular switch for the sequential detection of  $\text{Al}^{3+}$  and  $\text{F}^-$ : Application in lung cancer live cell imaging and construction of logic gate, *Sens Actuators B Chem.* 242 (2017) 338–346.
3. D. Choe, C. Kim, An acylhydrazone-based fluorescent sensor for sequential recognition of  $\text{Al}^{3+}$  and  $\text{H}_2\text{PO}_4^-$ , *Materials* 14 (2021) 6392.
4. H. Liu, T. Liu, J. Li, Y. Zhang, J. Li, J. Song, J. Qu, W.-Y. Wong, A simple Schiff base as dual-responsive fluorescent sensor for bioimaging recognition of  $\text{Zn}^{2+}$  and  $\text{Al}^{3+}$  in living cells, *J. Mater. Chem. B*, 6 (2018) 5435–5442.
5. G. Bartwal, K. Aggarwal, J.M. Khurana, An ampyrone based azo dye as pH-responsive and chemo-reversible colorimetric fluorescent probe for  $\text{Al}^{3+}$  in semi-aqueous medium: implication towards logic gate analysis, *New J. Chem.* 42 (2018) 2224–2231.
6. M. Tajbakhsh, G. Chalmardi, A. Bekhradnia, R. Hosseinzadeh, N. Hasani, M. Amiri, A new fluorene-based Schiff-base as fluorescent chemosensor for selective detection of  $\text{Cr}^{3+}$  and  $\text{Al}^{3+}$ , *Spectrochim. Acta A*, 189 (2018) 22–31.
7. A. Saravanan, S. Shyamsivappan, N. Kalagatur, T. Suresh, N. Maroli, N. Bhuvanesh, P. Kolandaivel, P. Mohan, Application of real sample analysis and biosensing: synthesis of new naphthyl derived chemosensor for detection of  $\text{Al}^{3+}$  ions, *Spectrochim. Acta A*, 241 (2020) 118684.
8. R. Shanmugapriya, P. Kumar, K. Poongodi, C. Nandhini, K.P. Elango, 3-Hydroxy- 2-naphthoic hydrazide as a probe for fluorescent detection of cyanide and aluminium ions in organic and aquo-organic media and its application in food and pharmaceutical samples, *Spectrochim. Acta A*, 249 (2021) 119315.
9. V. Kumar, S. Kundu, B. Sk, A. Patra, A naked-eye colorimetric sensor for methanol and ‘turn-on’ fluorescence detection of  $\text{Al}^{3+}$ , *New J. Chem.*, 43 (2019) 18582–18589.

10. N. Behera, V. Manivannan, A Probe for Multi Detection of  $\text{Al}^{3+}$ ,  $\text{Zn}^{2+}$  and  $\text{Cd}^{2+}$  Ions via Turn-On Fluorescence Responses, *J. Photochem. Photobiol. A*, 353 (2018) 77–85.
11. B. Kaura, A. Gupta, N. Kaur, A simple Schiff base as a multi responsive and sequential sensor towards  $\text{Al}^{3+}$ ,  $\text{F}^-$  and  $\text{Cu}^{2+}$  ions, *J. Photochem. Photobiol. A* 389 (2020) 112140.
12. A. Mondal, E. Ahmmed, S. Chakraborty, A. Sarkar, S. Lohar, P. Chattopadhyay, Aggregation induced emission enhancement (AIEE) of naphthalene appended organic moiety: An  $\text{Al}^{3+}$  ion selective turn on fluorescent probe, *Chemistry Select*, 5 (2020) 147–155.
13. G. Kumar, K. Paul, V. Luxami, Aggregation induced emission -excited state intramolecular proton transfer based “off-on” fluorescent sensor for  $\text{Al}^{3+}$  ions in liquid and solid state, *Sens. Actuators B. Chem.* 263 (2018) 585–593.
14. X. Mei Jiang, W.H. Mi, W. Zhu, H. Yao, Y.M. Zhang, T.B. Wei, Q. Lin, A biacylhydrazone-based chemosensor for fluorescence ‘turn-on’ detection of  $\text{Al}^{3+}$  with high selectivity and sensitivity, *Supramolecular Chemistry*, 31 (2019) 80–88.
15. Y. Xu, H. Wang, J. Zhao, X. Yang, M. Pei, G. Zhang, Y. Zhang, A dual functional fluorescence sensor for detection of  $\text{Al}^{3+}$  and  $\text{Zn}^{2+}$  in different solvent, *New J. Chem.*, 43 (2019) 14320–14326.
16. Y. Tang, J. Sun and B. Yin, A dual-response fluorescent probe for  $\text{Zn}^{2+}$  and  $\text{Al}^{3+}$  detection in aqueous media: pH-dependent selectivity and practical application *Anal. Chim. Acta*, 942 (2016), 104.
